# Supplementary material
Source: Springer Nature journal article supplement (https://www.springermedizin.de/resource/supplementary/12906_2010_470_MOESM3_ESM.pdf/9519566)

# Dose effect of Plumbagin on collagen induced arthritis

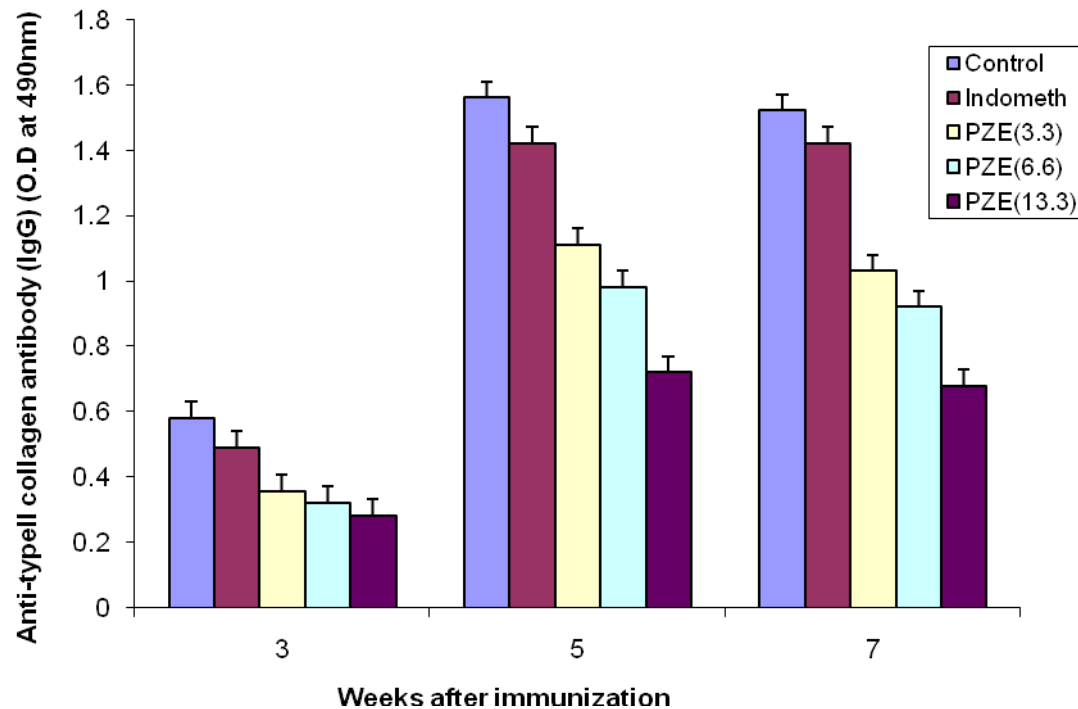

Supplement: MOESM3 [file 9519566]
